# Supplementary material for: Observations of the subtropical convergence zone (SCZ) and two significant periods of summer rain in Korea: a satellite study
Source: Research Square preprint supplement (doi:10.21203/rs.3.rs-8063449/v1), 2025-11-19
Supplement: Supplementary file 1 [file 231c459c3a4fe188a3d4712f.docx]

Supplements

(5 pages, 136 words)


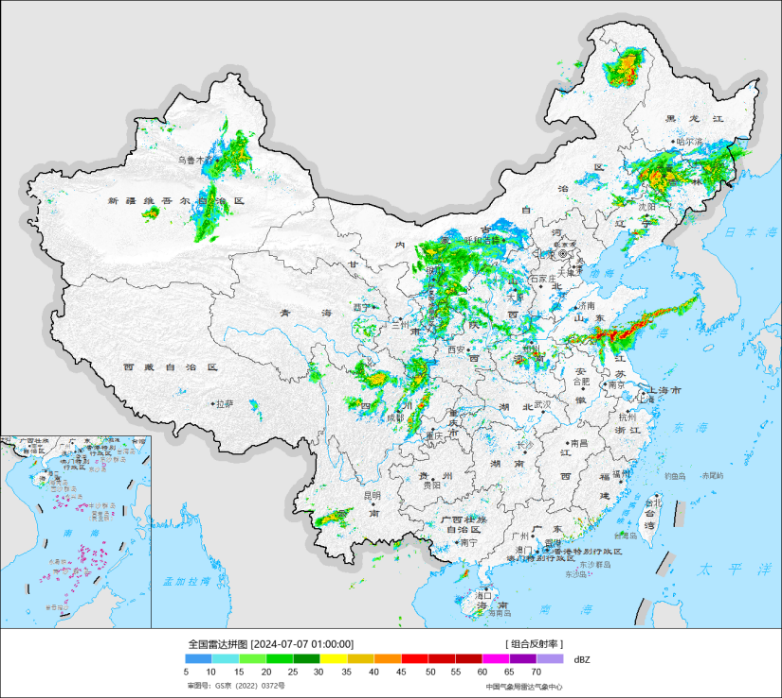


**Fig. S1.** Map of radar echoes for 7 July by the CMB showing a linear band of convective rain clouds extending from the Yellow Sea to Korea.


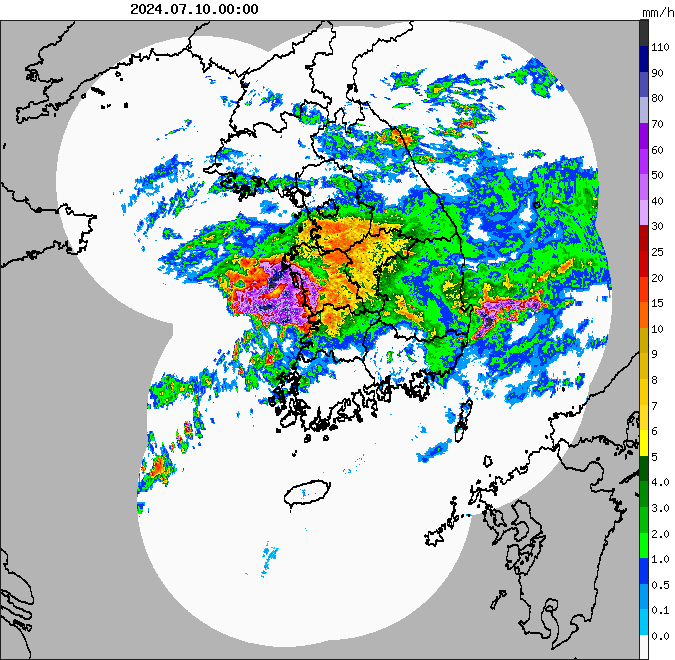


**Fig. S2.**  Radar echoes from the KMA showing an image of intensive rainfall

occurring in western Korea on 10 July 2024.


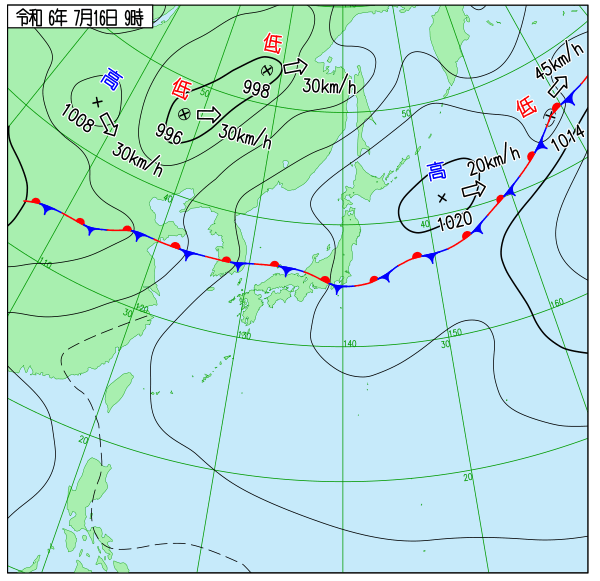


**Fig. S3.** Meteorological chart for 16 July given by the JMA.


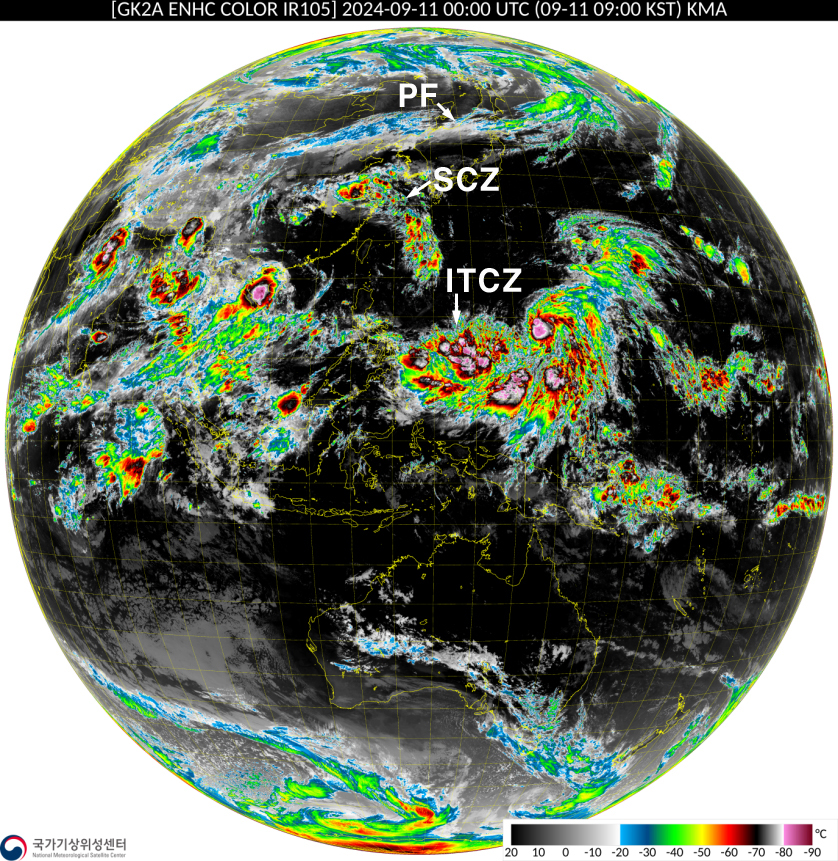


**Fig. S4.** Global satellite image from the KMA for 11 September showing the SCZ.


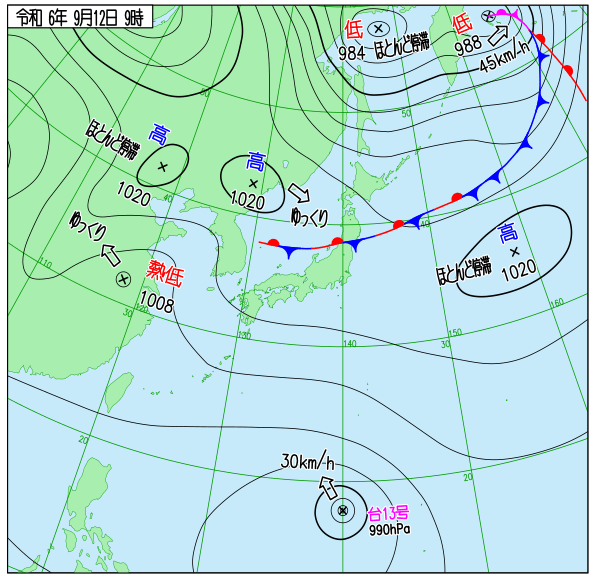


**Fig. S5.**  Meteorological map for 12 September from the JMA.


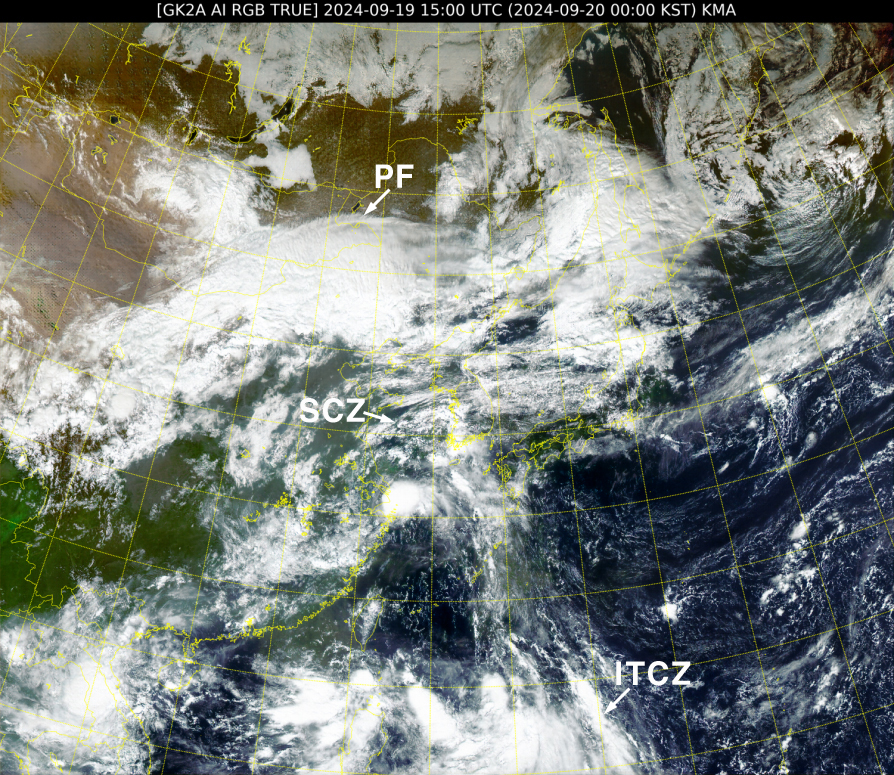


**Fig. S6.** Satellite image for 19 September from the KMA.


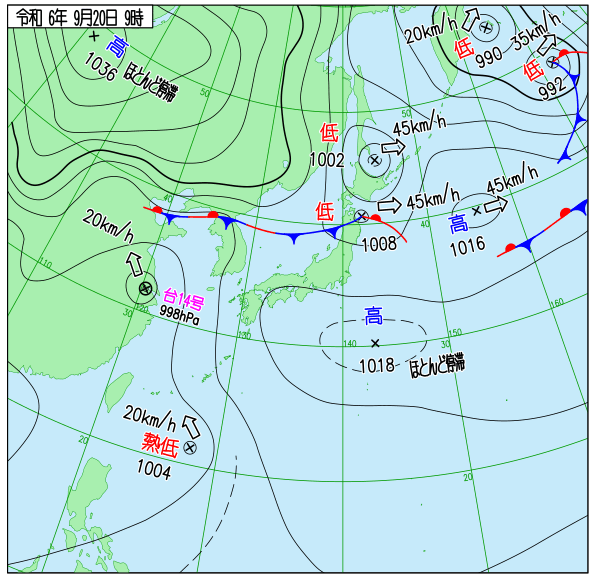


**Fig. S7.**  Meteorological map for 20 September from the JMA.


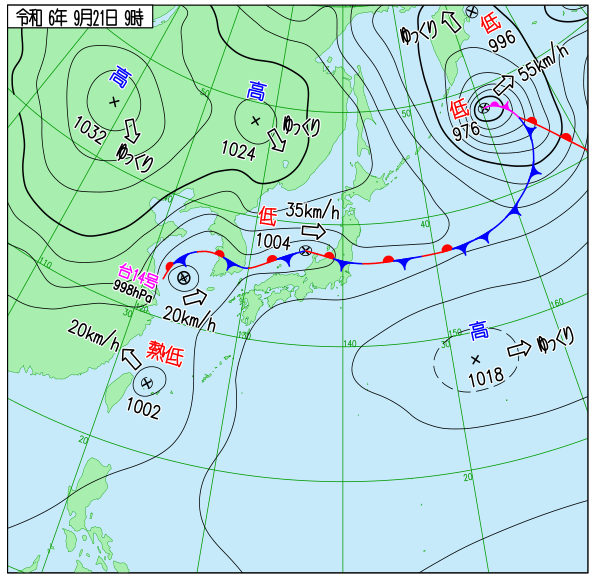


**Fig. S8.** Meteorological map for 21 September from the JMA.


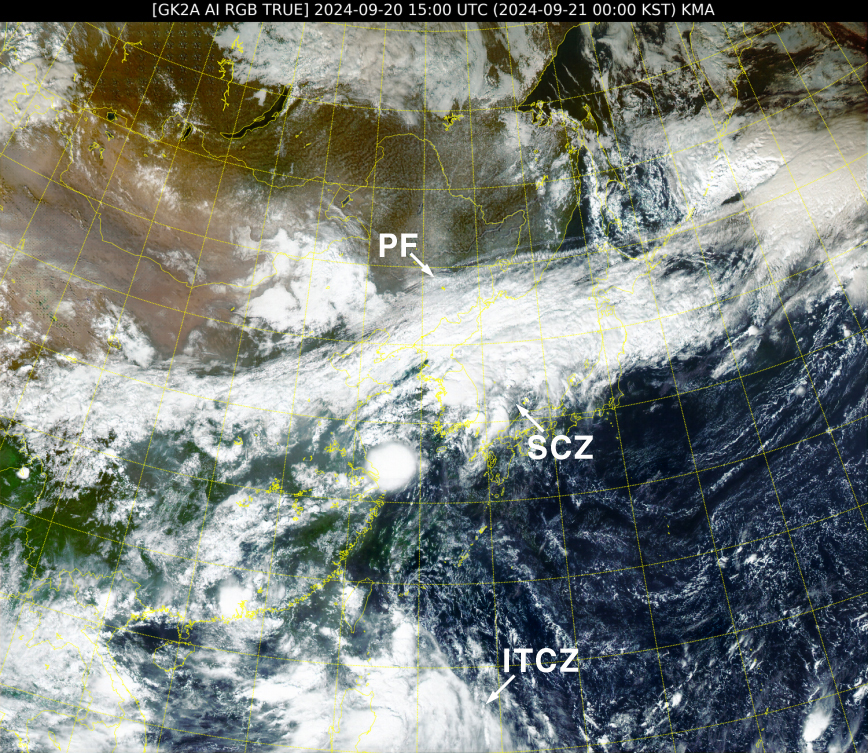


**Fig. S9.** Rgional satellite image for 20 September from the KMA.


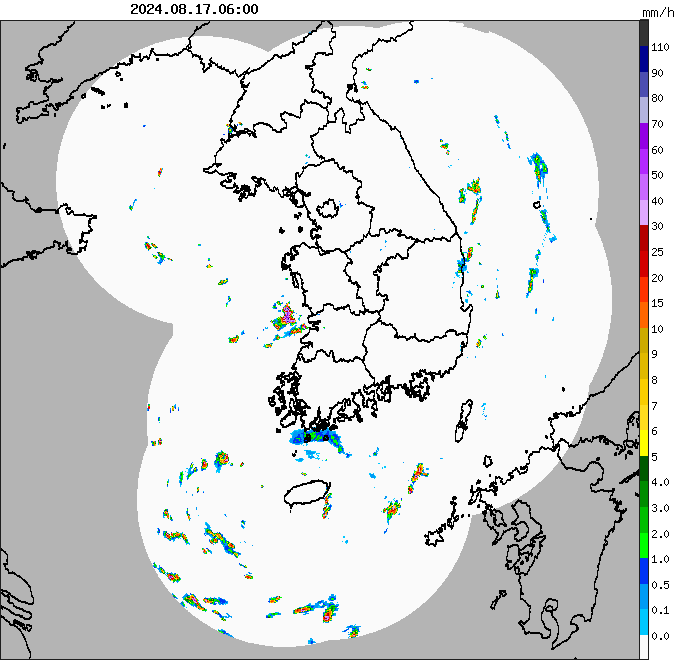


**Fig. S10.** Radar echoes for 17 August from the KMA.
